# Supplementary material for: Neurodevelopmental defects in human cortical organoids with N-acetylneuraminic acid synthase mutation
Source: PubMed Central journal article supplement — Sci Adv. 2023 Nov 24;9(47):eadf2772. doi: 10.1126/sciadv.adf2772 (PMC10672180; doi:10.1126/sciadv.adf2772), 2023-11-24
Supplement: sciadv.adf2772_sm.pdf [file sciadv.adf2772_sm.pdf]

Supplementary Materials for  
**Neurodevelopmental defects in human cortical organoids with  
*N*-acetylneuraminic acid synthase mutation**

Qian Bu *et al.*

Corresponding author: Xiaobo Cen, [xbcen@scu.edu.cn](mailto:xbcen@scu.edu.cn)

*Sci. Adv.* **9**, eadf2772 (2023)  
DOI: 10.1126/sciadv.adf2772

**The PDF file includes:**

Figs. S1 to S17  
Legends for tables S1 to S3  
Legends for movies S1 and S2

**Other Supplementary Material for this manuscript includes the following:**

Tables S1 to S3  
Movies S1 and S2

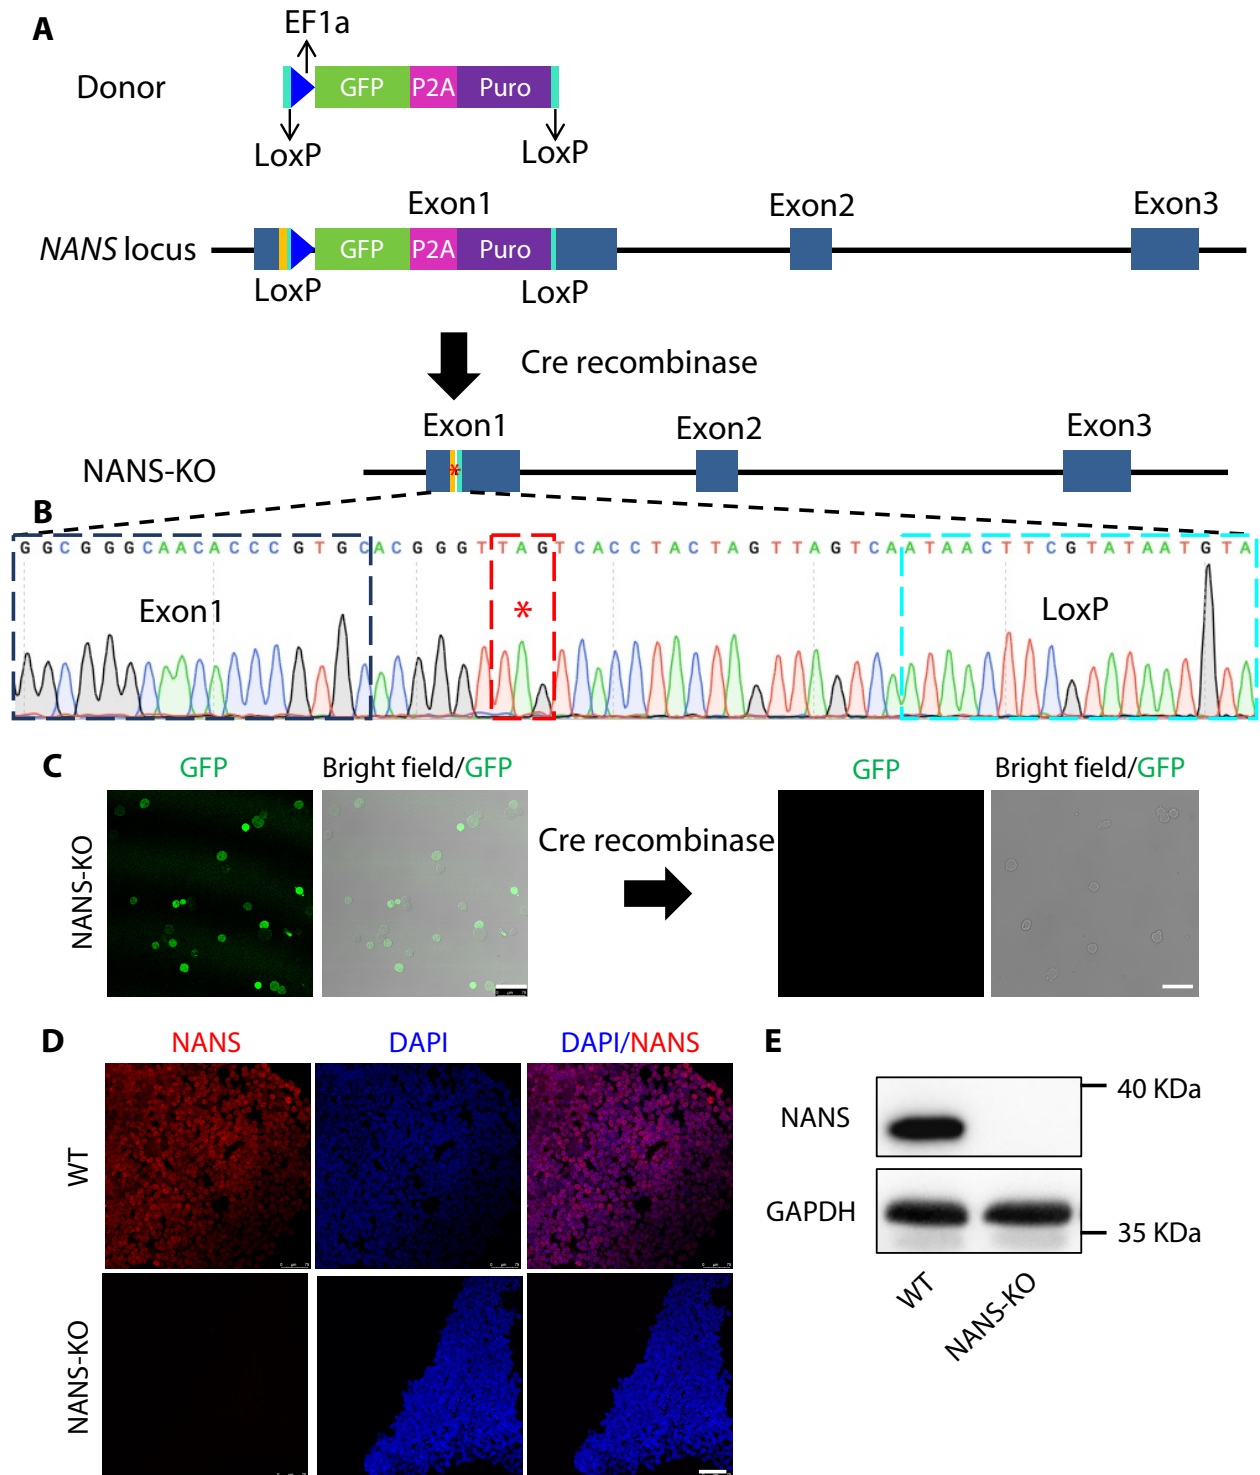

**Figure S1. Generation of NANS-KO iPSC line without GFP expression.**

(A) Schematic diagram of Cre recombinase-mediated deletion. Red star indicates an early stop codon.

(B) Representative sequencing chromatograms of DNA from NANS-KO iPSC line.

(C) NANS-KO iPSC line without GFP expression after Cre recombinase treatment. Scale bars: 75  $\mu$ m.

- (D) Confocal imaging of WT and NANS-KO iPSC lines after staining with antibodies against NANS. Scale bars: 75  $\mu\text{m}$ .
- (E) Western blot analyses of NANS expression in WT and NANS-KO iPSC lines.

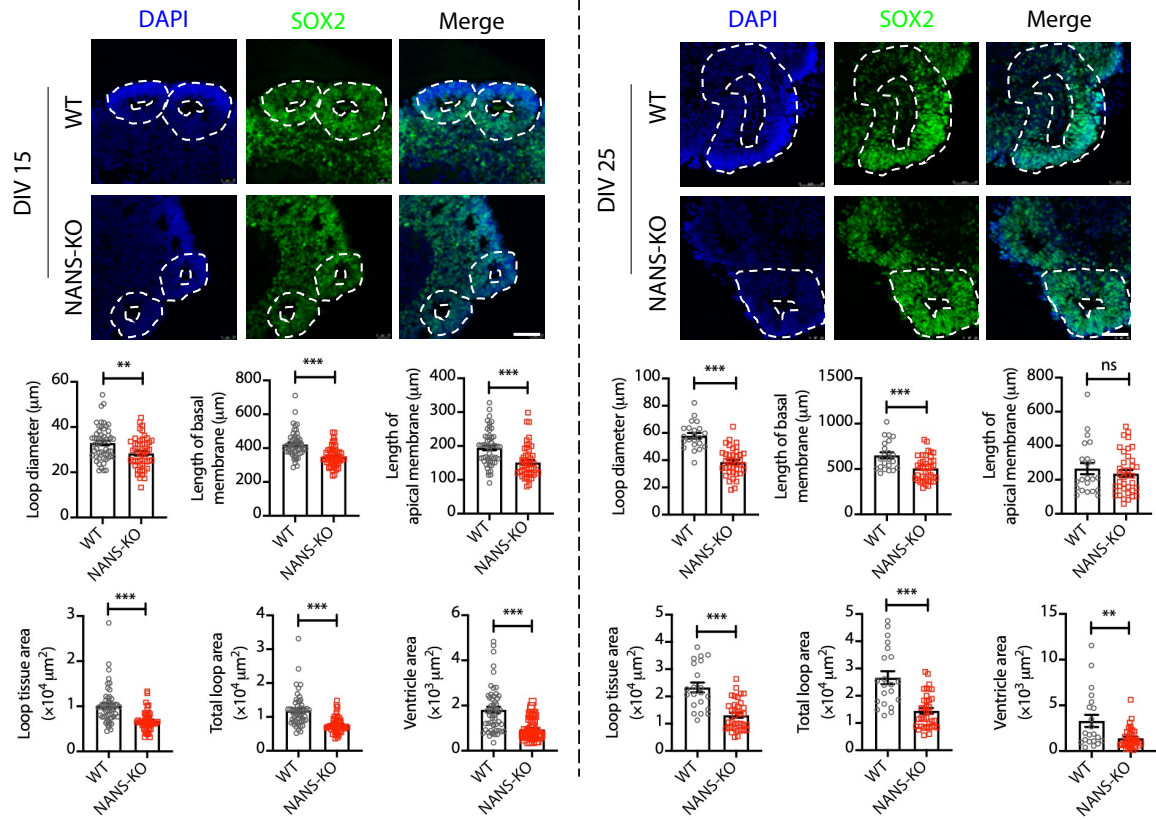

**Figure S2. Representative images and the quantification of the VZ-like area in WT and NANS-KO cerebral organoids.** n = 51~55 cortical structures (5~8 cortical structures per organoid) from 2 independent experiments at DIV 15; n = 22~38 cortical structures (4~6 cortical structures per organoid) from 2 independent experiments at DIV 25. \*\* $P < 0.01$ ; \*\*\* $P < 0.001$ , Student's  $t$ -test. Scale bar: 50  $\mu\text{m}$ .

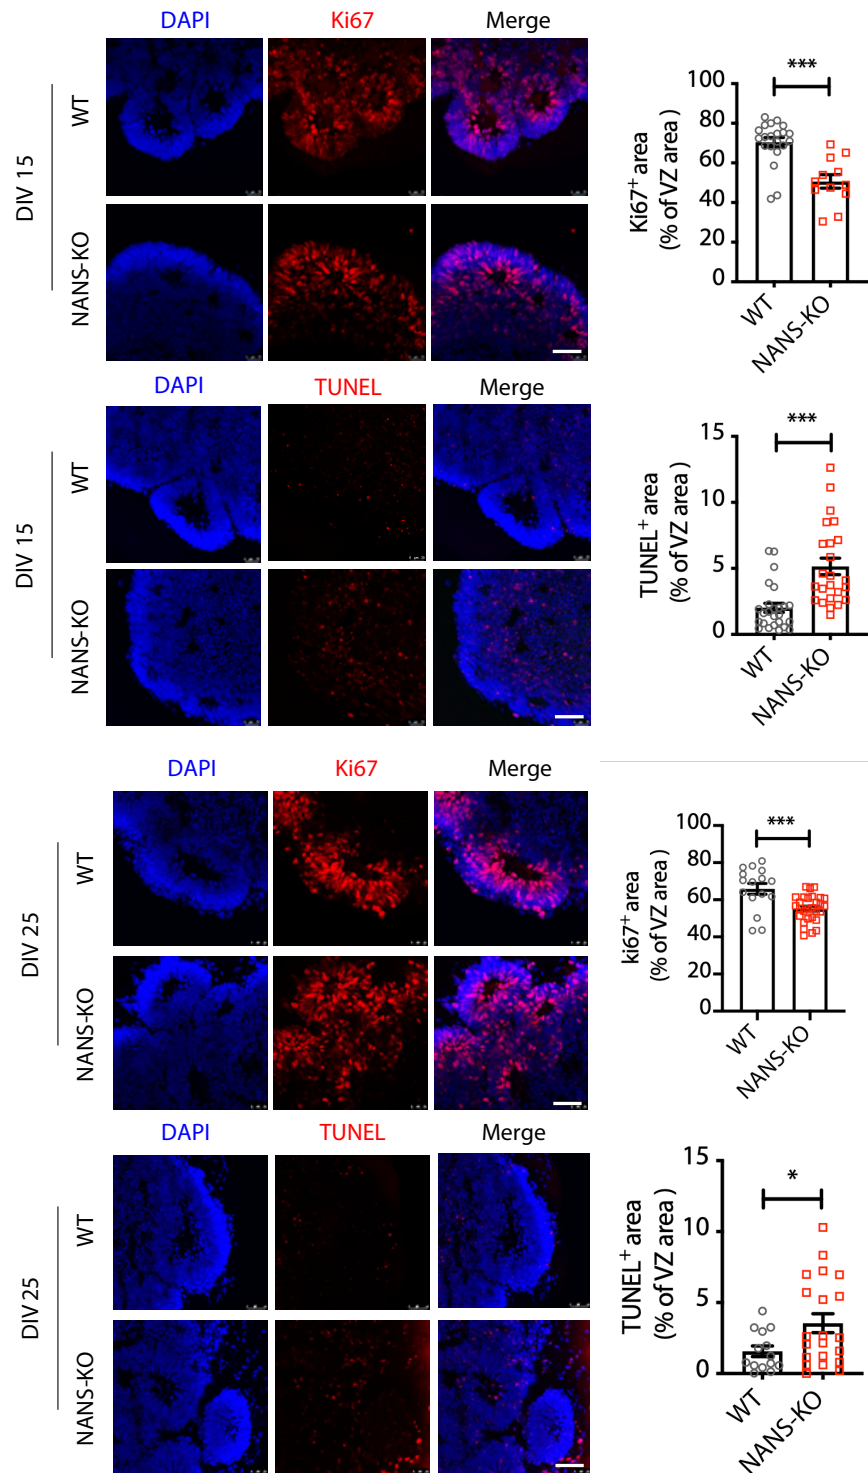

**Figure S3. Representative images and quantification of WT and NANS-KO cerebral organoids stained with Ki67 and TUNEL.** n = 12~21 cortical structures (4~7 cortical structures per organoid) from 1 independent experiment, \* $P < 0.05$ , \*\*\* $P < 0.001$ , Student's  $t$ -test. Scale bar: 50  $\mu\text{m}$ .

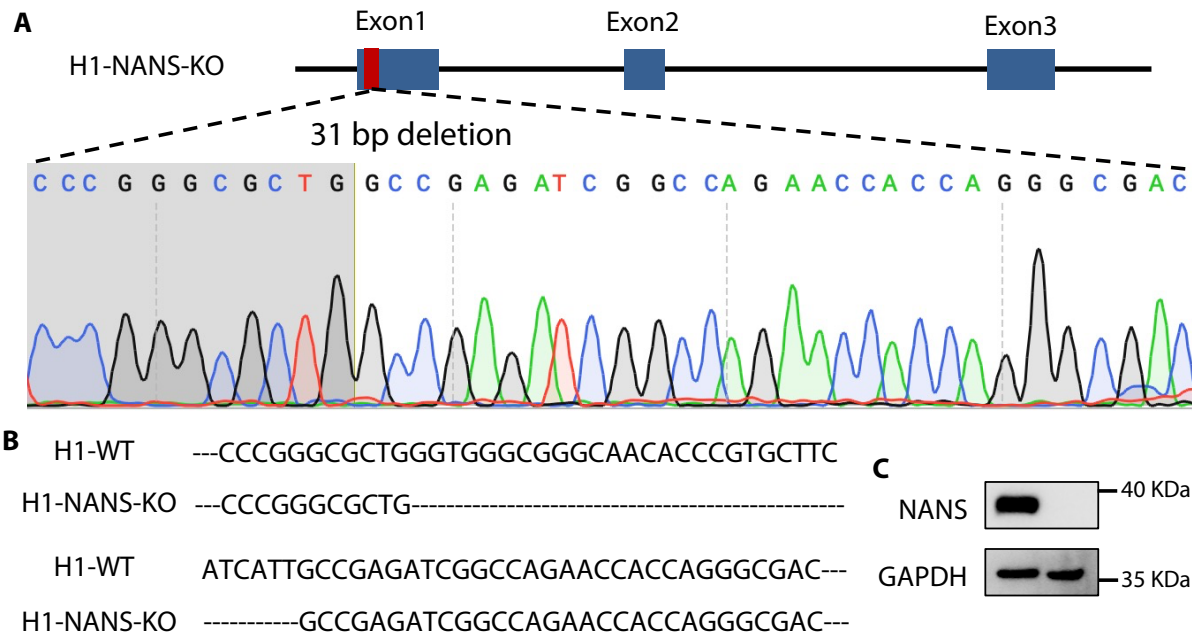

**Figure S4. Generation of H1-NANS-KO hESC line.**

- (A) Schematic diagram of the NANS knock-out strategy in H1 hESC line, and sanger sequencing.
- (B) Representative sequencing chromatograms of DNA from the H1-WT and H1-NANS-KO hESC lines.
- (C) Western blot analyses of NANS protein in H1-WT and H1-NANS-KO hESC lines.

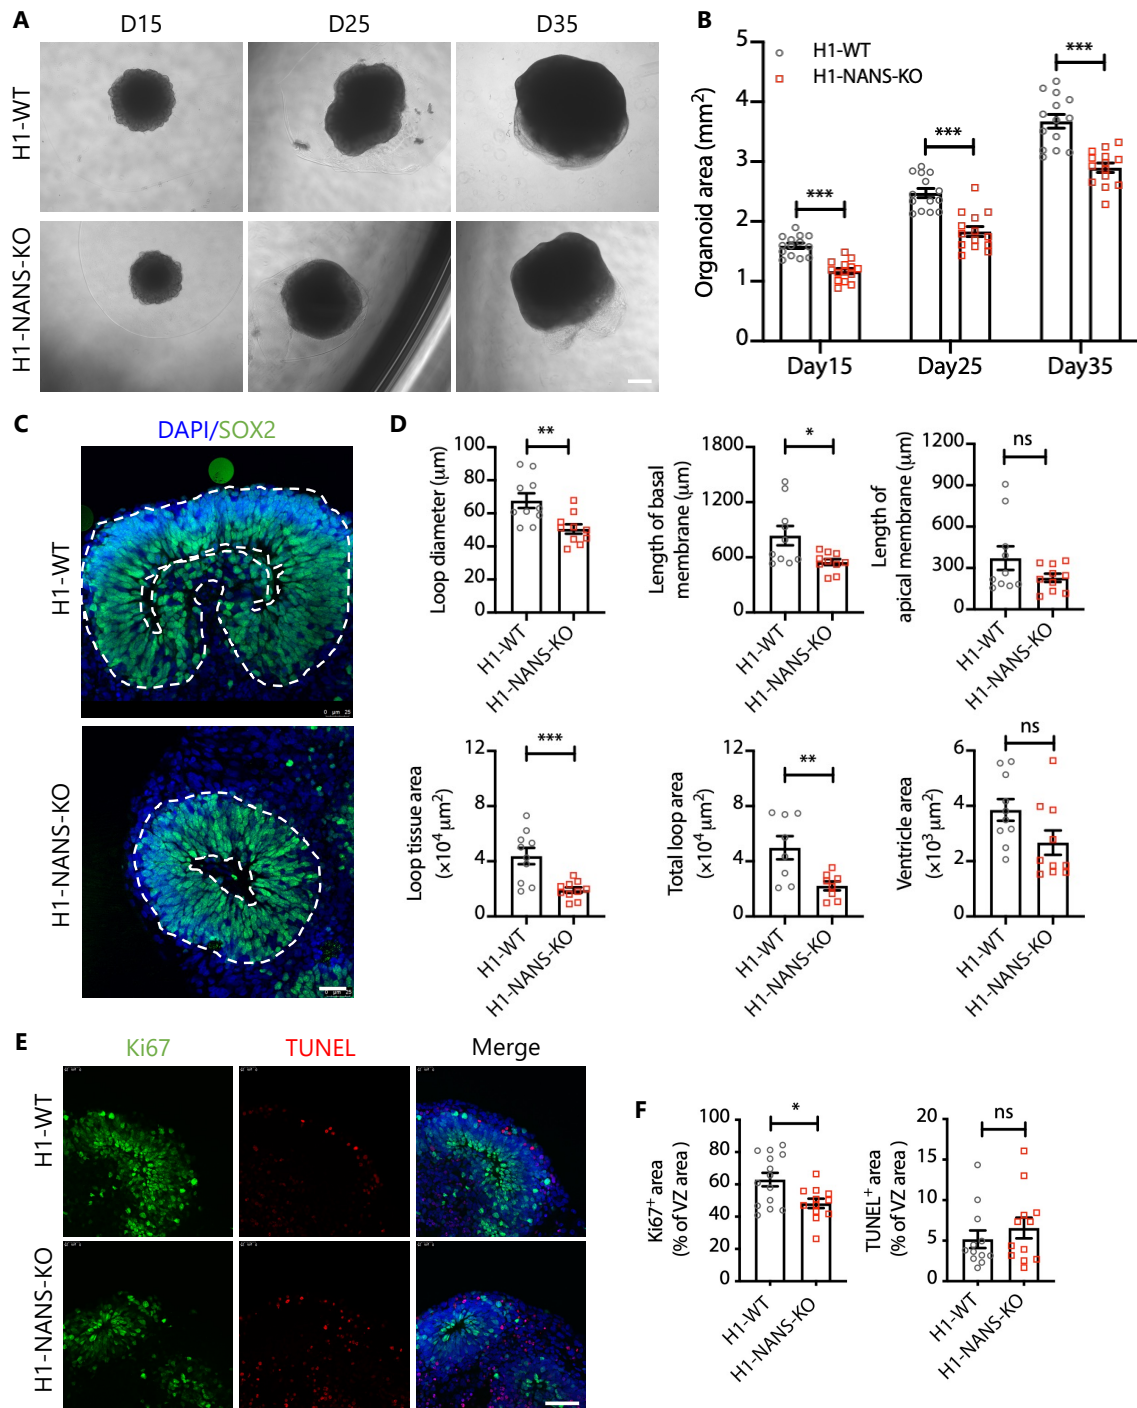

**Figure S5. Reduced size and expansion of cerebral organoids in H1-NANS-KO cell line.**

(A) Bright-field microscopy images of H1-WT and H1-NANS-KO cerebral organoids at DIV 15, 25, and 35. Scale bar: 500  $\mu\text{m}$ .

(B) Quantification of cerebral organoid area.  $n = 14$  organoids from 1 independent experiment.

\*\*\* $P < 0.001$ , two-way repeated-measure ANOVA followed by Bonferroni's multiple comparisons test.

- (C) Confocal imaging H1-WT and H1-NANS-KO cerebral organoids at DIV 35 after staining with antibodies against SOX2. Scale bars: 75  $\mu\text{m}$ .
- (D) Quantification of the parameters in the neuroepithelial loops of H1-WT and H1-NANS-KO cerebral organoids at DIV 35.  $n = 10$  neuroepithelial loops (4~5 neuroepithelial loops per organoid) from 1 independent experiment,  $*P < 0.05$ ,  $**P < 0.01$ ,  $***P < 0.001$  Student's  $t$ -test.
- (E) Representative images of H1-WT and H1-NANS-KO cerebral organoids at DIV 35 were stained with Ki67<sup>+</sup> and TUNEL<sup>+</sup>. Scale bar: 50  $\mu\text{m}$ .
- (F) Quantification of the percentage of Ki67<sup>+</sup> and TUNEL<sup>+</sup> positive cells among the total cells in the examined areas.  $n = 12$  cortical structures (3~5 cortical structures per organoid) from 1 independent experiment,  $***P < 0.001$ , Student's  $t$ -test.



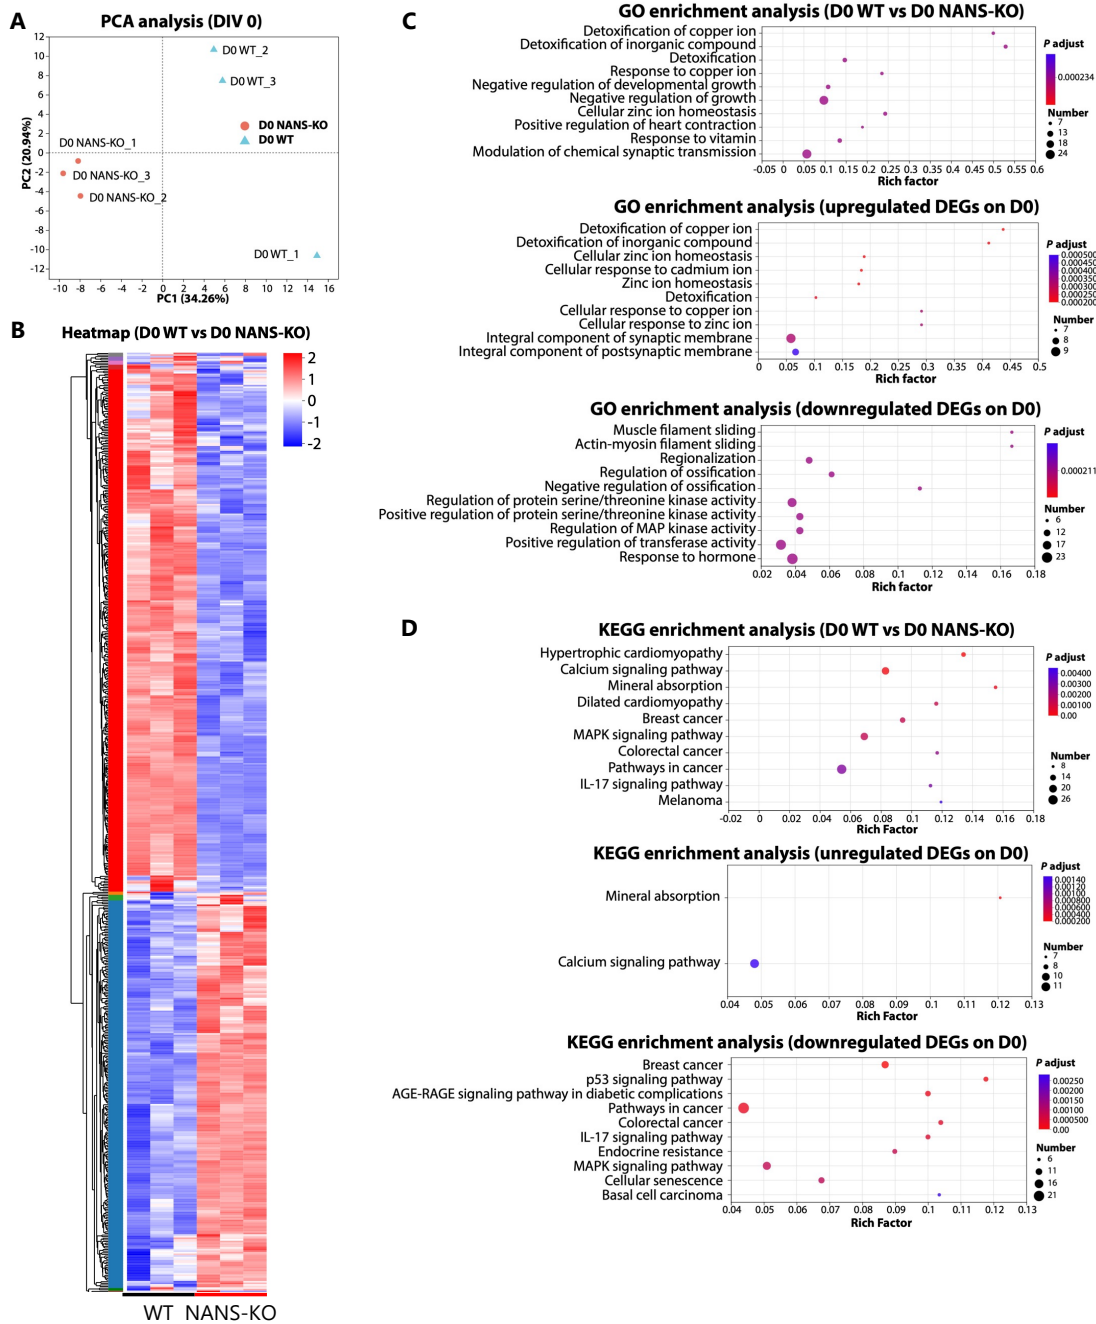

**Figure S6. The PCA, heatmap, GO and KEGG enrichment analysis of DEGs in WT and NANS-KO iPSCs.**

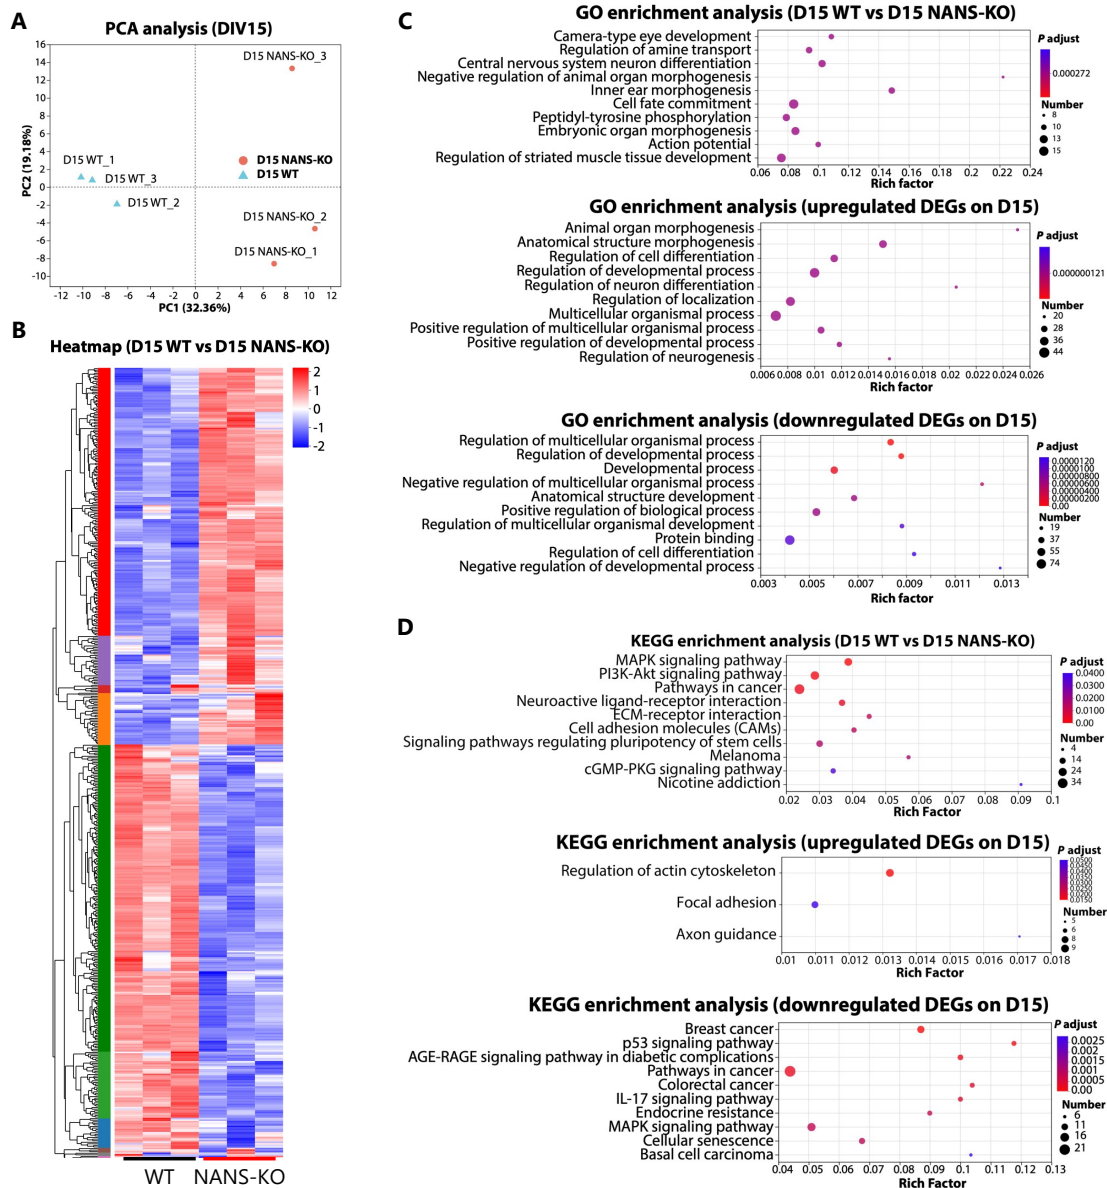

**Figure S7. The PCA, heatmap, GO and KEGG enrichment analysis of DEGs in WT and NANS-KO cerebral organoids at DIV 15.**

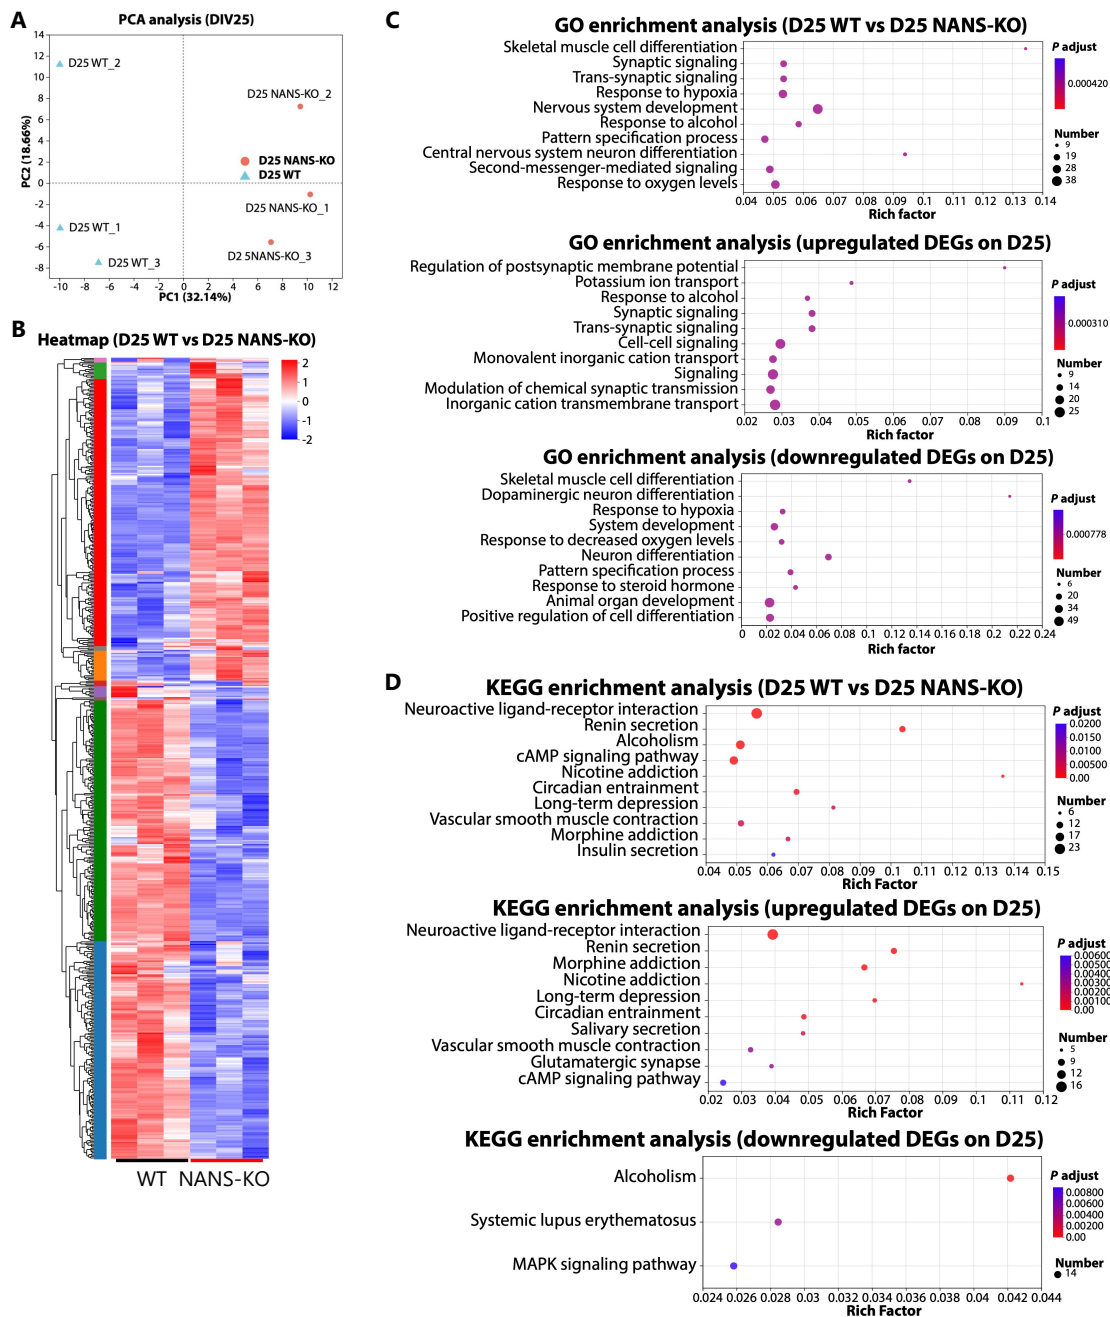

**Figure S8. The PCA, heatmap, GO and KEGG enrichment analysis of DEGs in WT and NANS-KO cerebral organoids at DIV 25.**

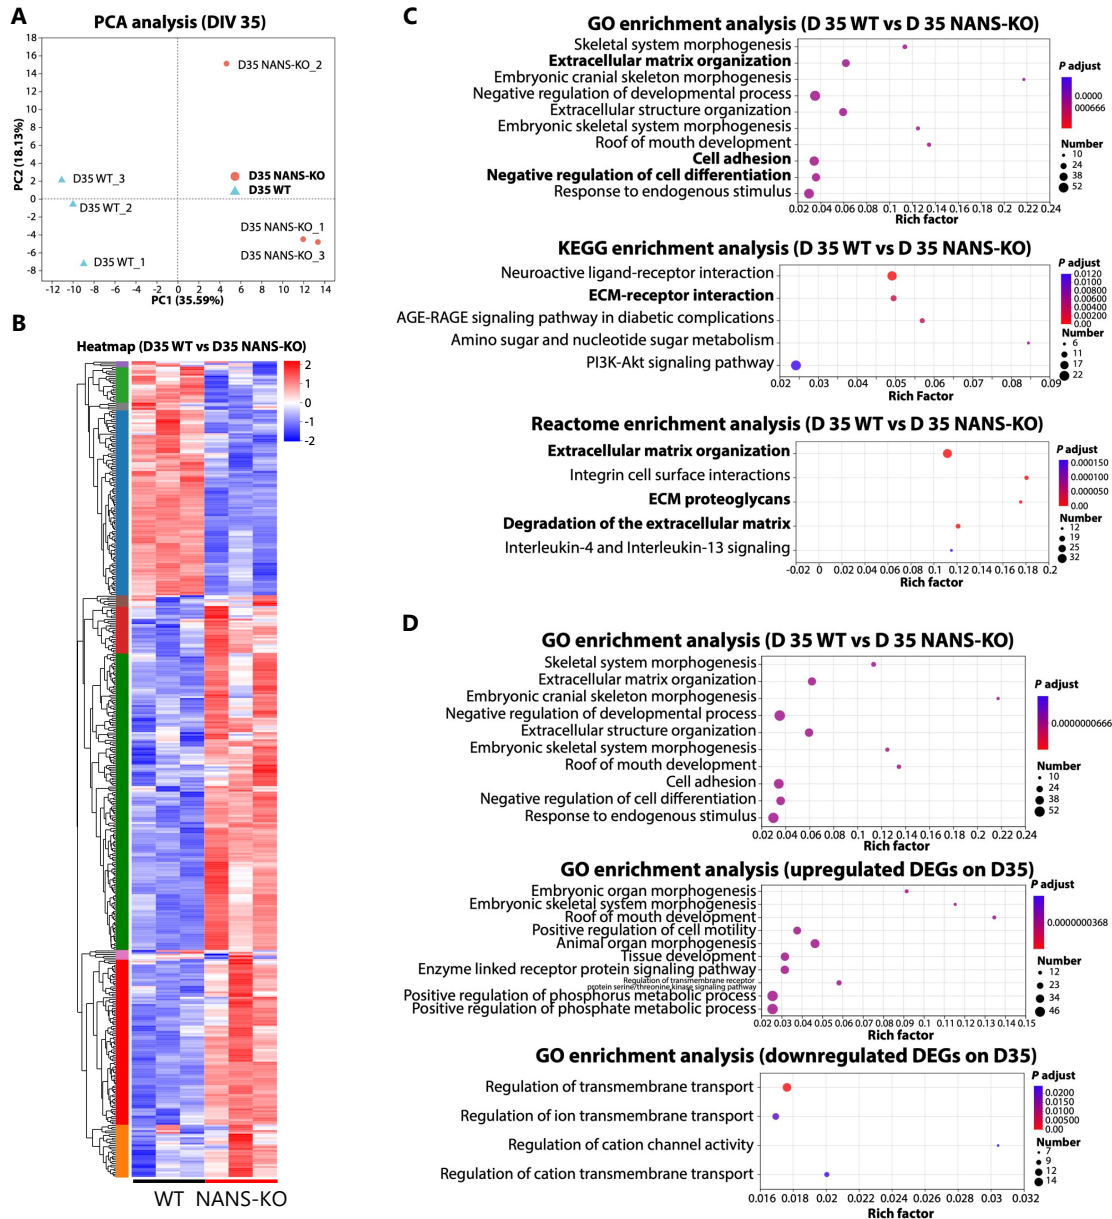

**Figure S9. The PCA, heatmap, GO and KEGG enrichment analysis of DEGs in WT and NANS-KO cerebral organoids at DIV 35.**

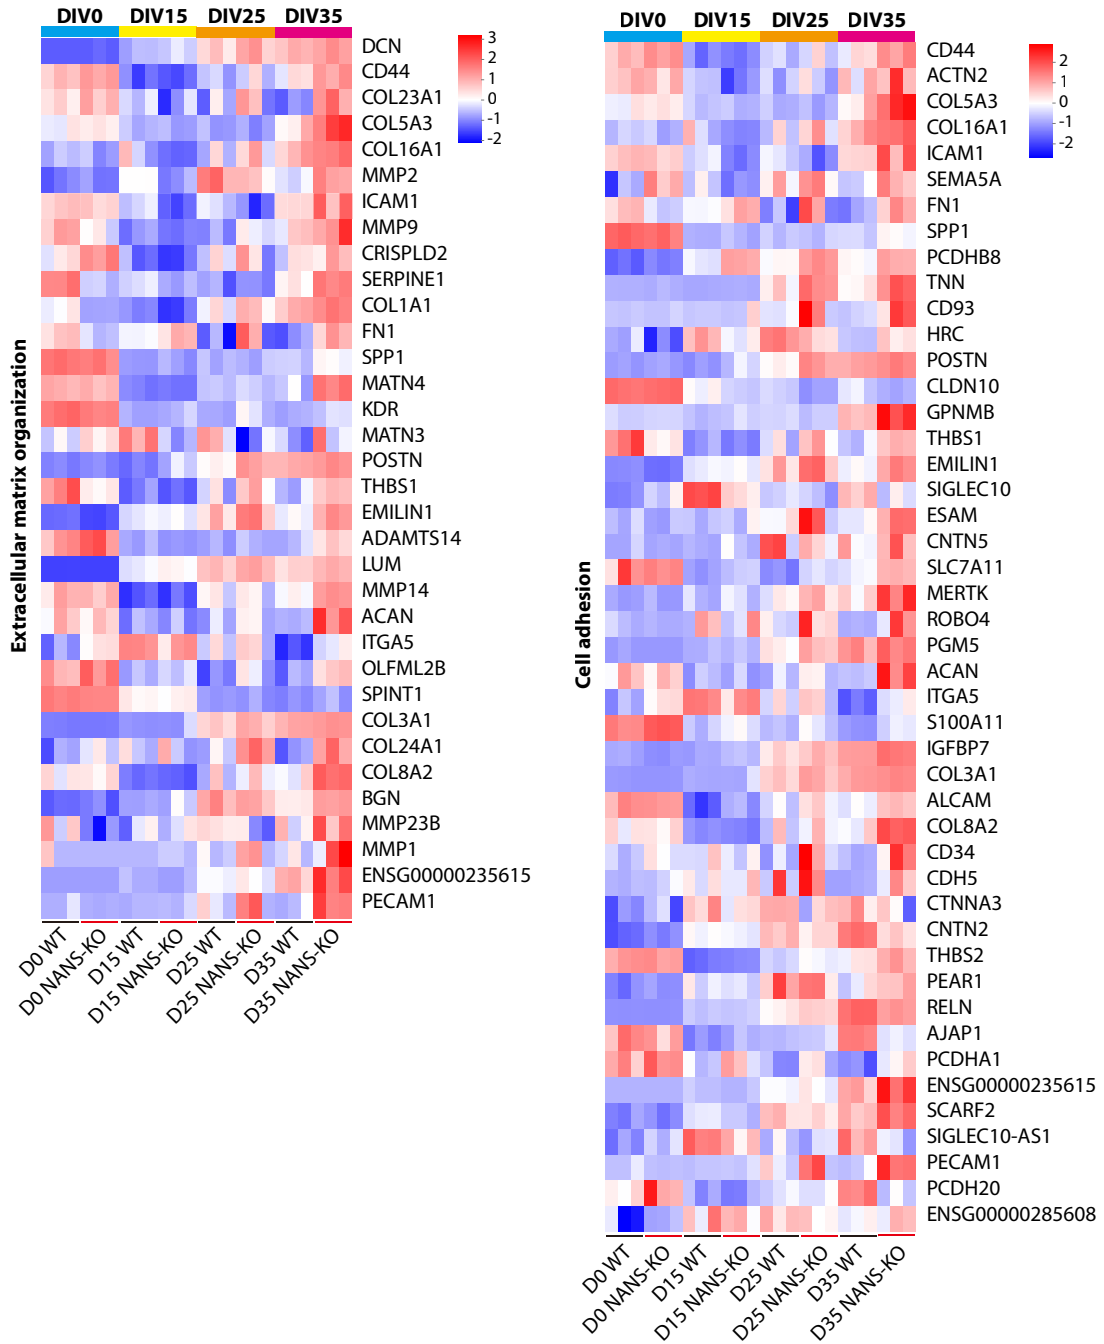

**Figure S10. Gene expression heatmap of extracellular matrix organization and cell adhesion at DIV 0, 15, 25, and 35**

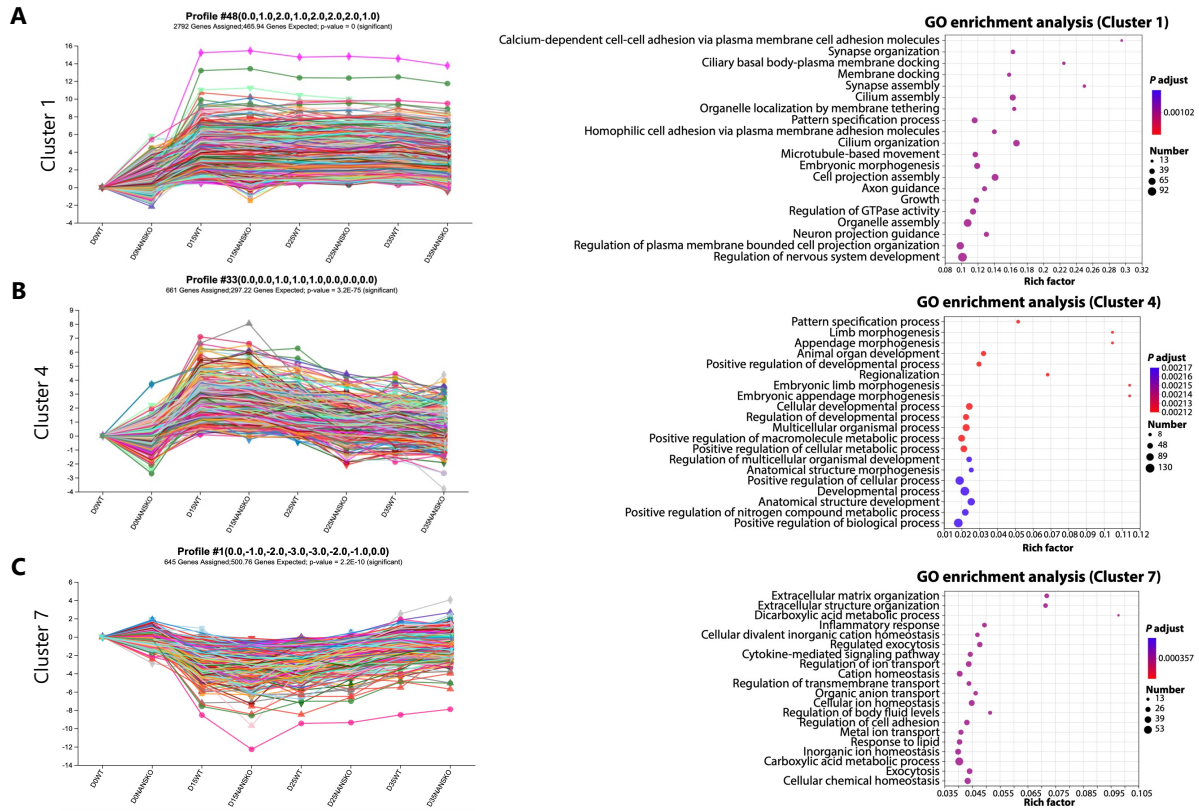

Figure S11. GO enrichment analysis of genes in cluster 1, 4 and 7.

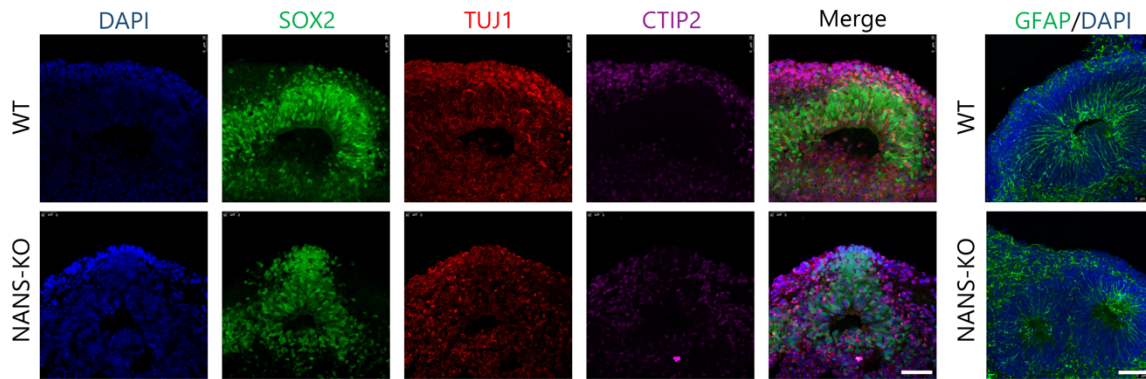

**Figure S12. Characterization of cerebral organoids from WT and NANS-KO.** Immunostaining of SOX2 (green), TUJ1 (red), CTIP2 (purple), and GFAP (green) in cerebral organoids at DIV 63. The cell nuclei were stained with DAPI (blue). Scale bar: 50  $\mu\text{m}$ .

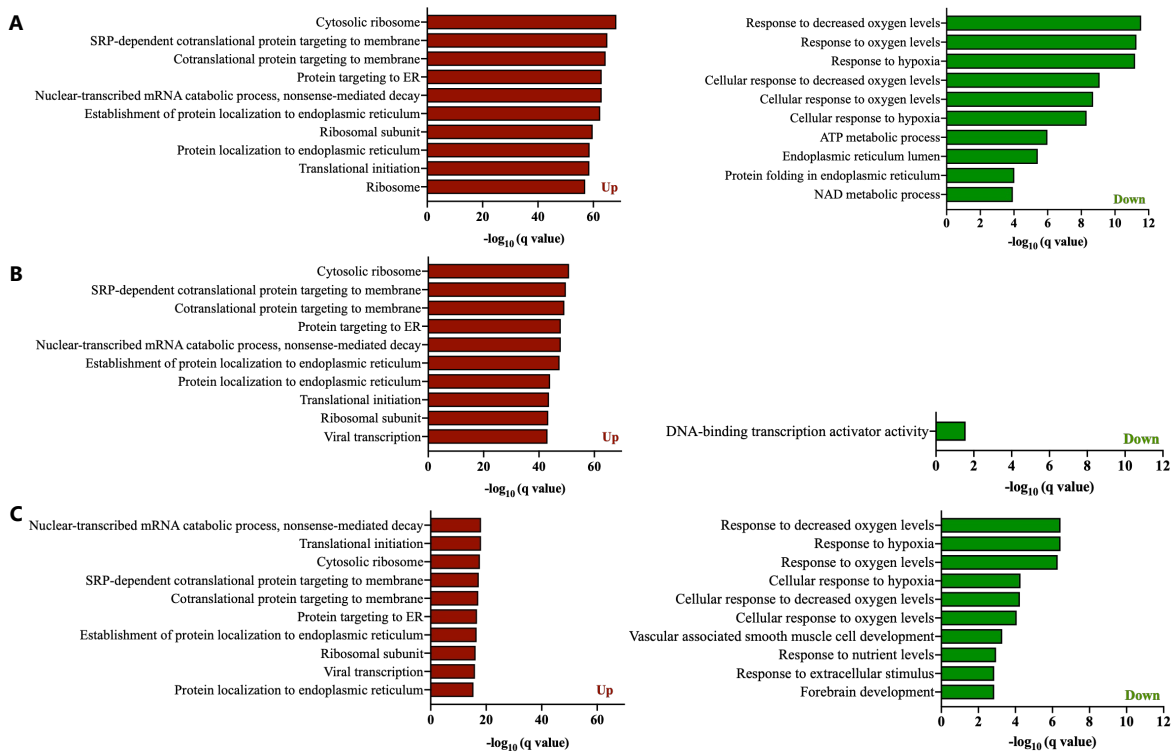

**Figure S13. GO enrichment of glia (A), neuron (B), and oRGs (C) in cerebral organoids at DIV 63.**



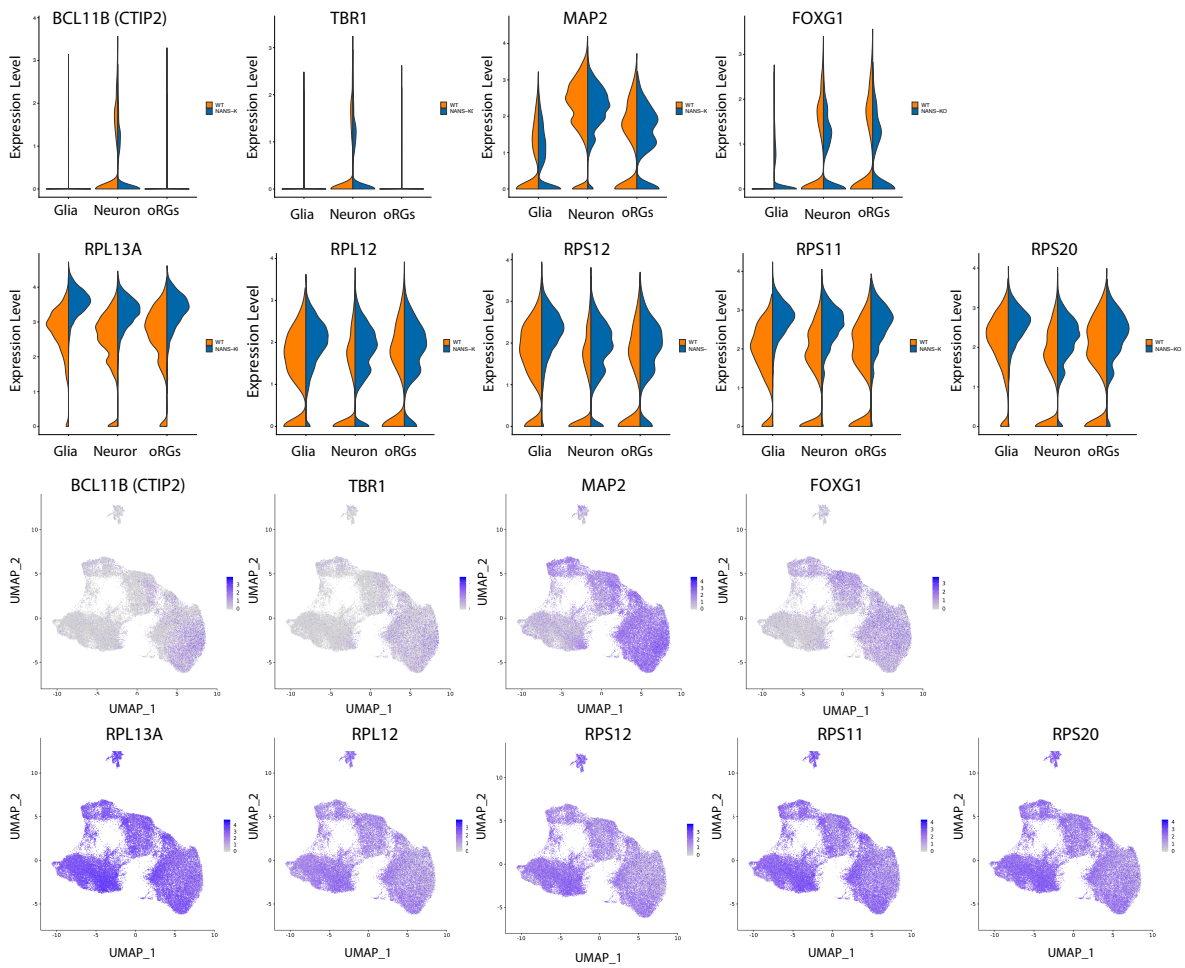

**Figure S14. Violin plot and feature plots of BCL11B (CTIP2), TBR1, MAP2, FOXG1, RPL13A, RPL12, RPS12, RPS11, and RPS20 in WT and NANS-KO cerebral organoids.**

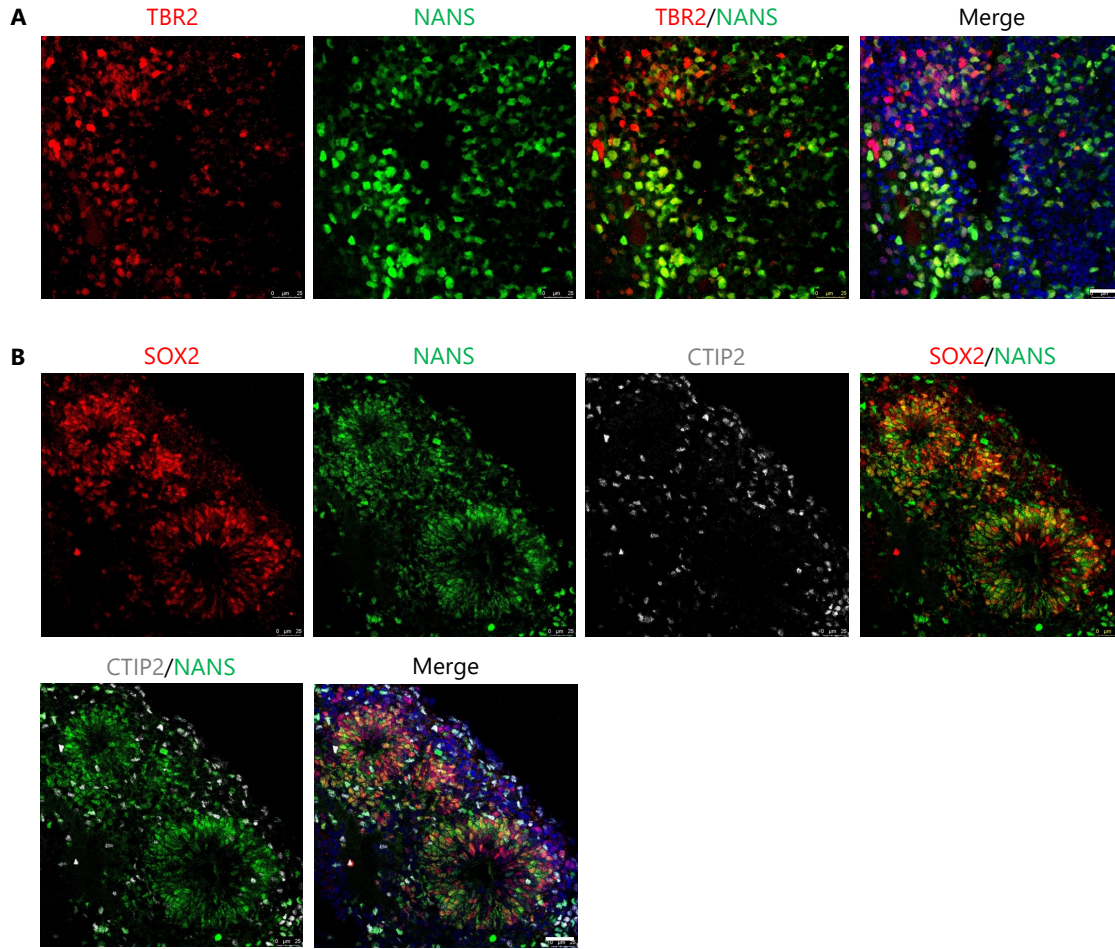

**Figure S15. Immunostaining of TBR2/NANS (A) and SOX2/NANS/CTIP2 (B) in cerebral organoids at DIV 63. Cell nuclei were stained with DAPI (blue). Scale bar: 25  $\mu$ m.**

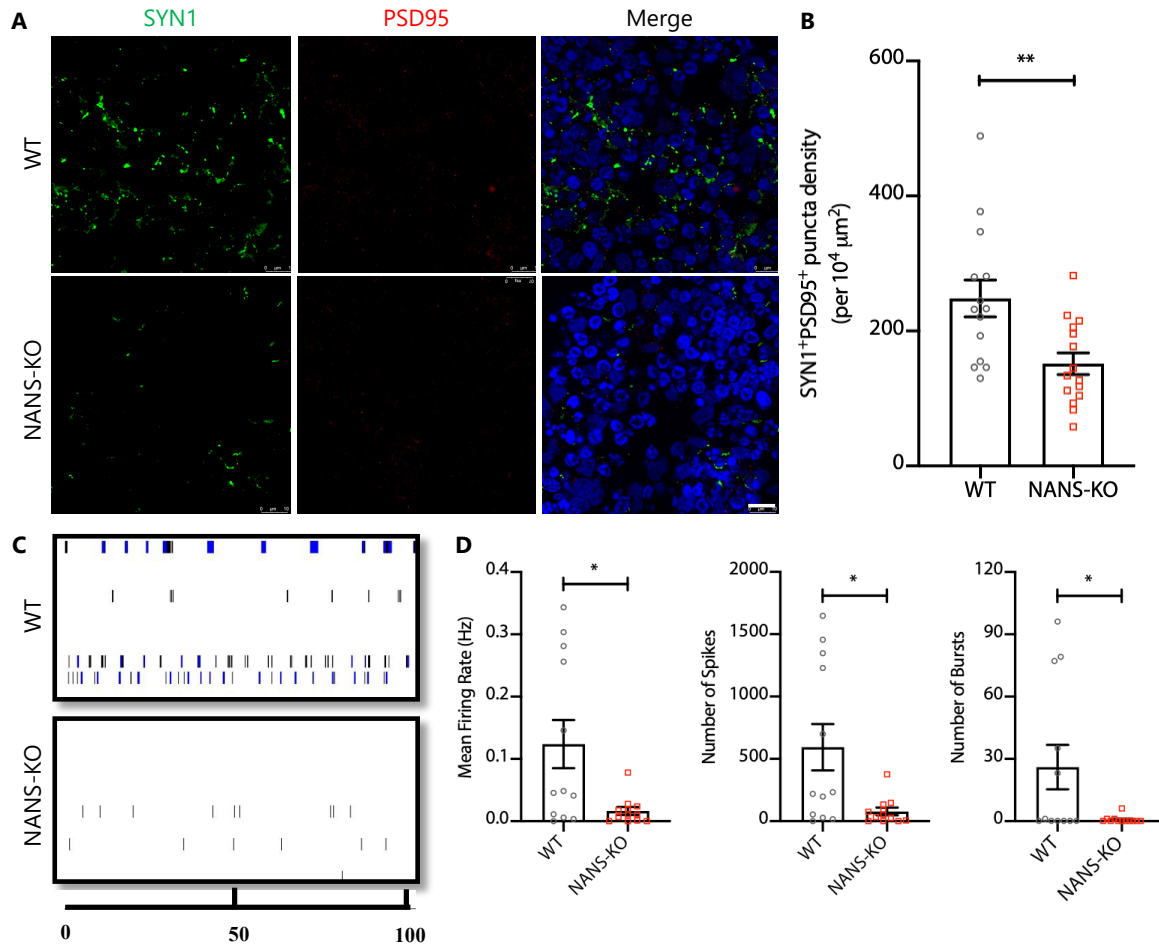

**Figure S16. Additional functional characterizations of *NANS* mutation impairs synapse formation and neuronal network activity, related to Figure 6.**

(A and B) *NANS* mutation impairs synapse formation in *NANS*-KO organoids. Representative images (A) and quantification (B) of SYN1<sup>+</sup>/PSD95<sup>+</sup> puncta density in WT and *NANS*-KO cerebral organoids at DIV 63.  $n = 14\sim 15$  cortical structures (3~5 cortical structures per organoid) from 2 independent experiments,  $**P < 0.01$ , Student's t-test. Scale bar: 10 μm.

(C) Representative spike raster plots of WT and *NANS*-KO-derived cortical neurons.

(D) MEA analysis reveals a reduction in the mean firing rate and the total number of spikes and bursts in *NANS*-KO neurons.  $n = 12$  MEA wells per genotype from 1 independent experiment,  $*P < 0.05$ , Student's t-test.

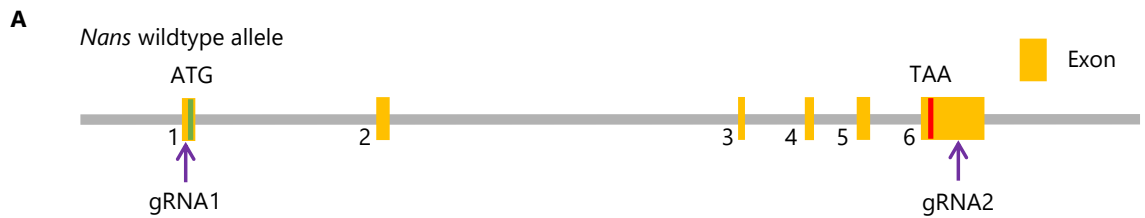

**B** PCR screening  
 Forward primer (F1): 5'-AACACCTACTTTCCTGACTGCTT-3'  
 Reverse primer (R1): 5'-ACAATAGCACCTTGTCTGGGTTT-3'  
 Targeted allele: 523 bp Wildtype allele: 14268 bp

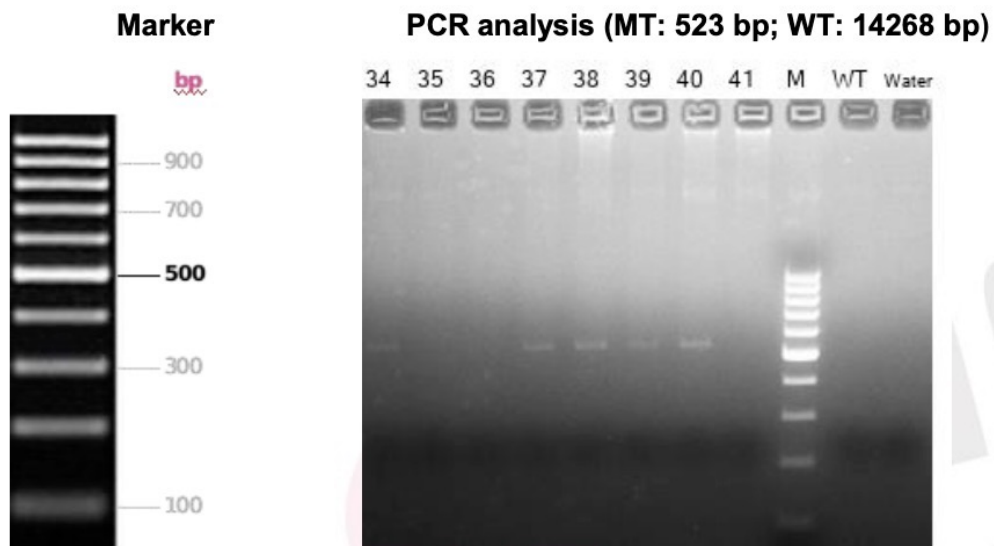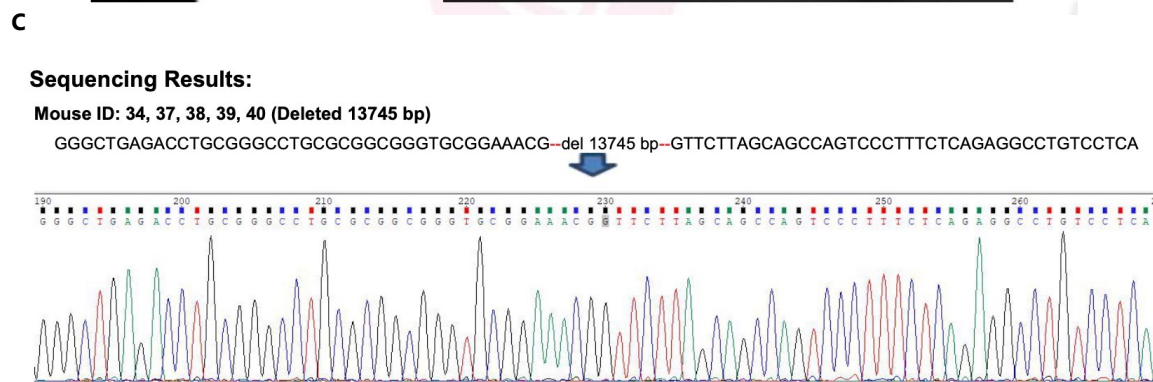

**Figure S17. Generation and characterization of the *Nans*<sup>+/-</sup> mice.**

(A) Schematic diagram of the *Nans*<sup>+/-</sup> targeting strategy in mice.

(B) PCR screening of *Nans* in mice.

(C) Representative sequencing chromatograms of DNA from the *Nans*<sup>+/-</sup> mice, showing the 13745bp deletion in *Nans*<sup>+/-</sup> mice.

**Other Supplementary Materials for this manuscript include the following:**

**Supplementary Table S1. Biomarkers for neuronal cells.**

**Supplementary Table S2. RNA-seq - Differentially expressed genes in WT and NANS-KO cerebral organoids at DIV 0, 15, 25, and 35. Related to Figure 3.**

**Supplementary Table S3. Time-series clustering of the genes based on gene expression profile changes was conducted using the STEM software. Related to Figure 3**

**Supplementary Movie S1. Live imaging of WT migrating cortical neurons.**

**Supplementary Movie S2. Live imaging of NANK-KO migrating cortical neurons.**
